# Supplementary material
Source: Research Square preprint supplement (doi:10.21203/rs.3.rs-9205166/v1)

**Figure 1.** Bland-Altman plot comparing device-measured and self-reported sleep duration

**
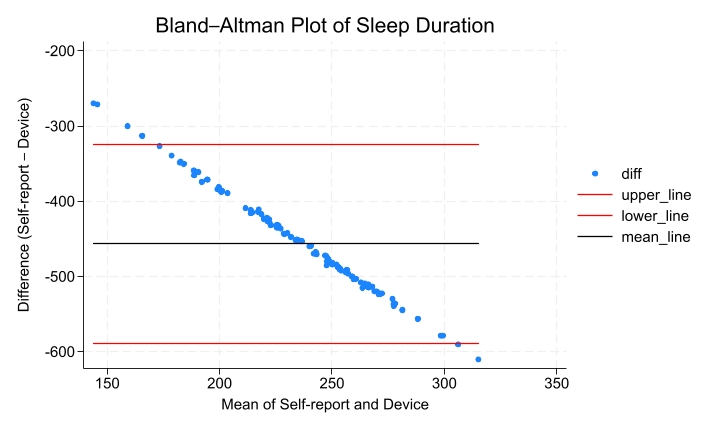
**

Supplement: Supplementary file 1 [file 9c106c30473f1c45db62e048.docx]
